# Supplementary material for: Amalgamating 4′-substituted 4,2′:6′,4′′-terpyridine ligands with double-helical chains or ladder-like networks
Source: Royal Society of Chemistry journal article supplement (doi:10.1039/c5ra24044a), 2016-01-01

***Electronic Supporting Information:***

**Amalgamating 4'-substituted 4,2':6',4''-terpyridine ligands with double-helical chains or ladder-like networks**

Guoqi Zhang,<sup>a\*</sup> Jiawen Tan,<sup>a</sup> Tonya Phoenix,<sup>a</sup> David R. Manke,<sup>b</sup> James A. Golen<sup>b</sup> and Arnold L. Rheingold<sup>c</sup>

<sup>a</sup> Department of Sciences, John Jay College and The Graduate Center, The City University of New York, New York, NY 10019, USA.

<sup>b</sup> Department of Chemistry and Biochemistry, University of Massachusetts Dartmouth, North Dartmouth, MA 02747, USA.

<sup>c</sup> Department of Chemistry, University of California San Diego, La Jolla, CA 92093, USA.

**Fig. S1. Measured and simulated powder X-ray diffraction (PXRD) profile for compound 1.**

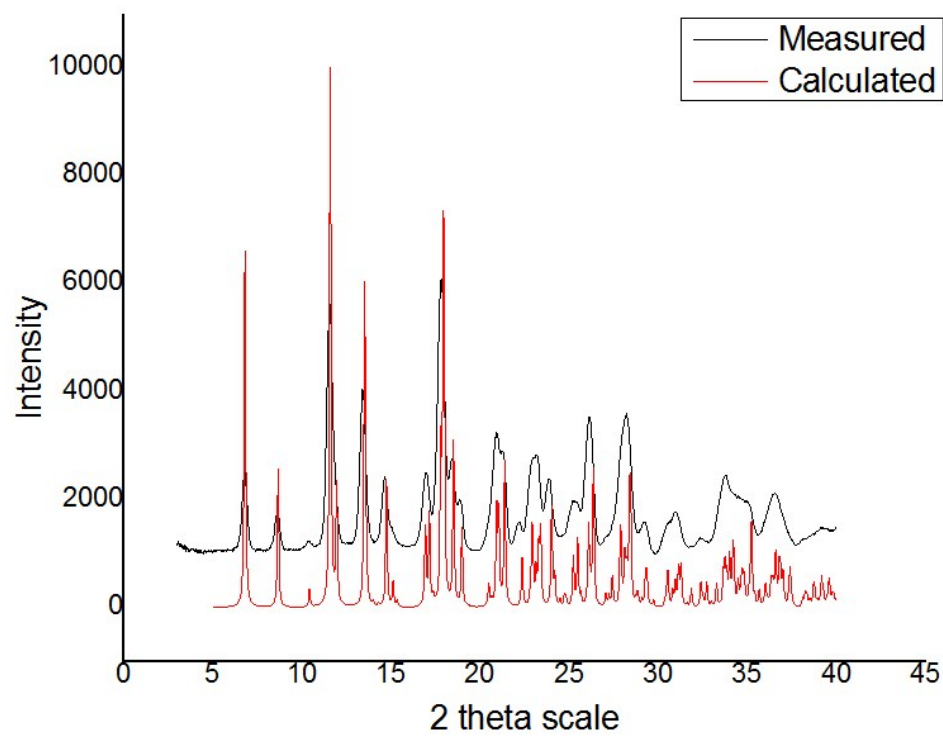

**Fig. S2. Measured and simulated powder X-ray diffraction (PXRD) profile for compound 2.**

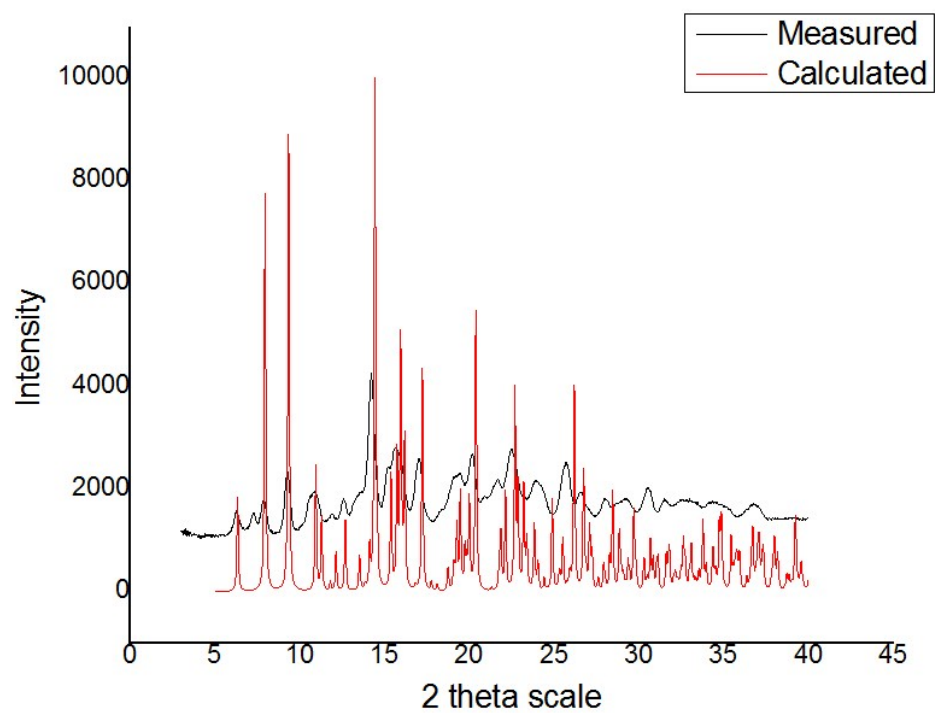

Fig. S3. Measured and simulated powder X-ray diffraction (PXRD) profile for compound 3.

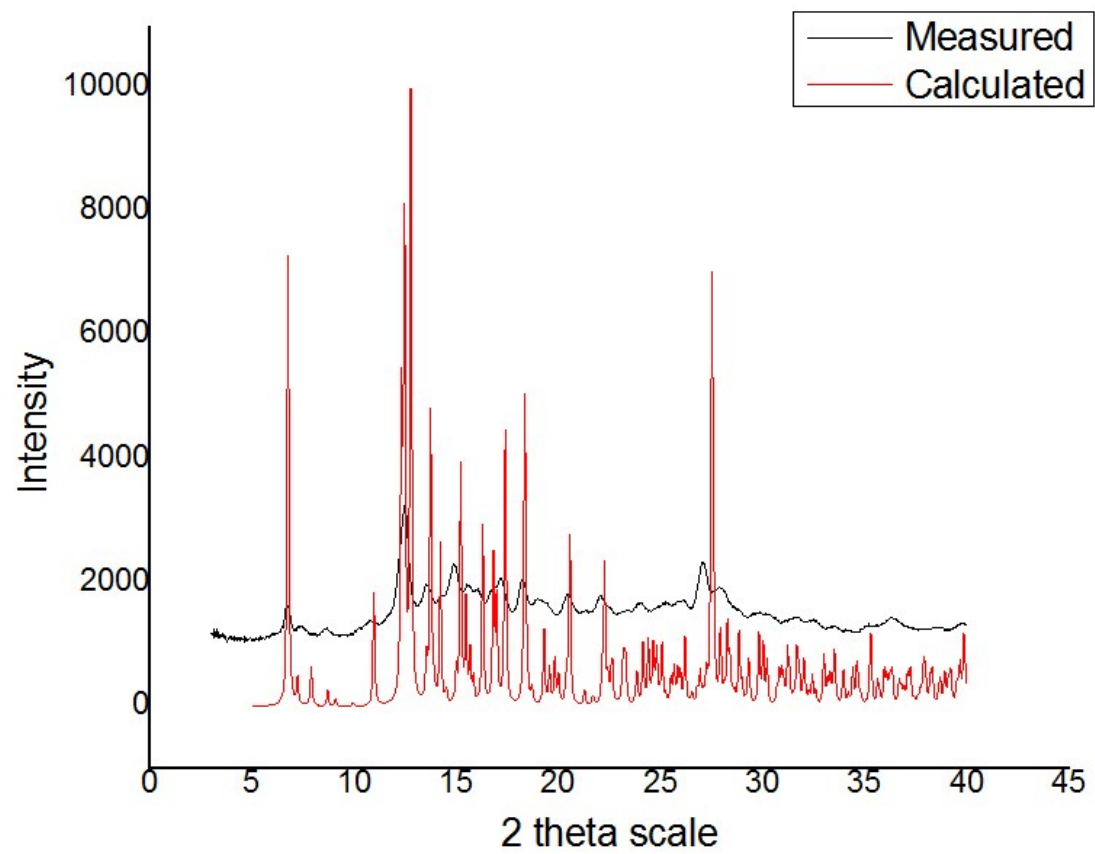

**Fig. S4. Measured and simulated powder X-ray diffraction (PXRD) profile for compound 4.**

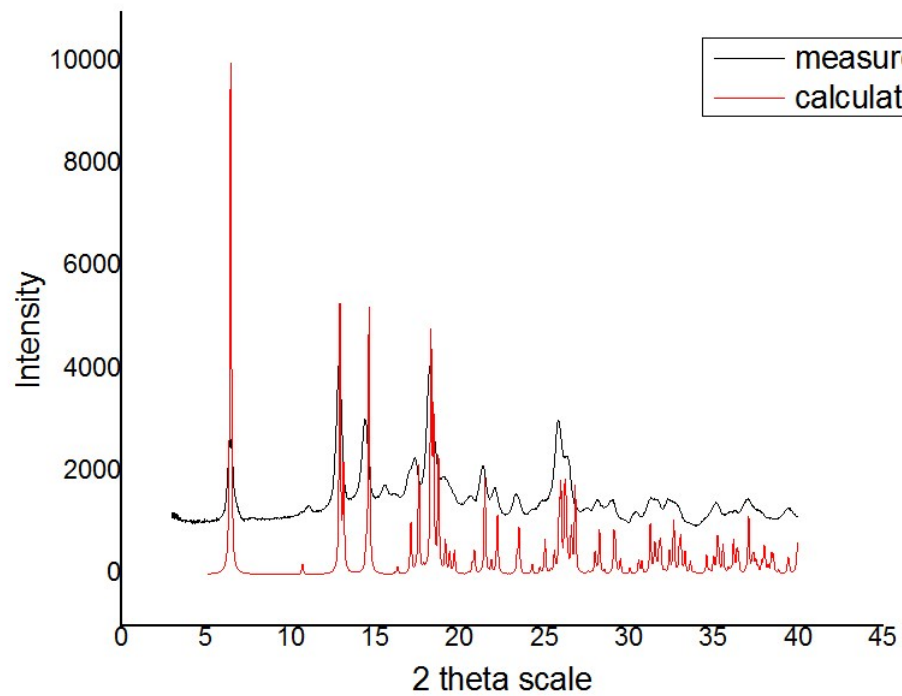

**Fig. S5.** Measured and simulated powder X-ray diffraction (PXRD) profile for compound 5.

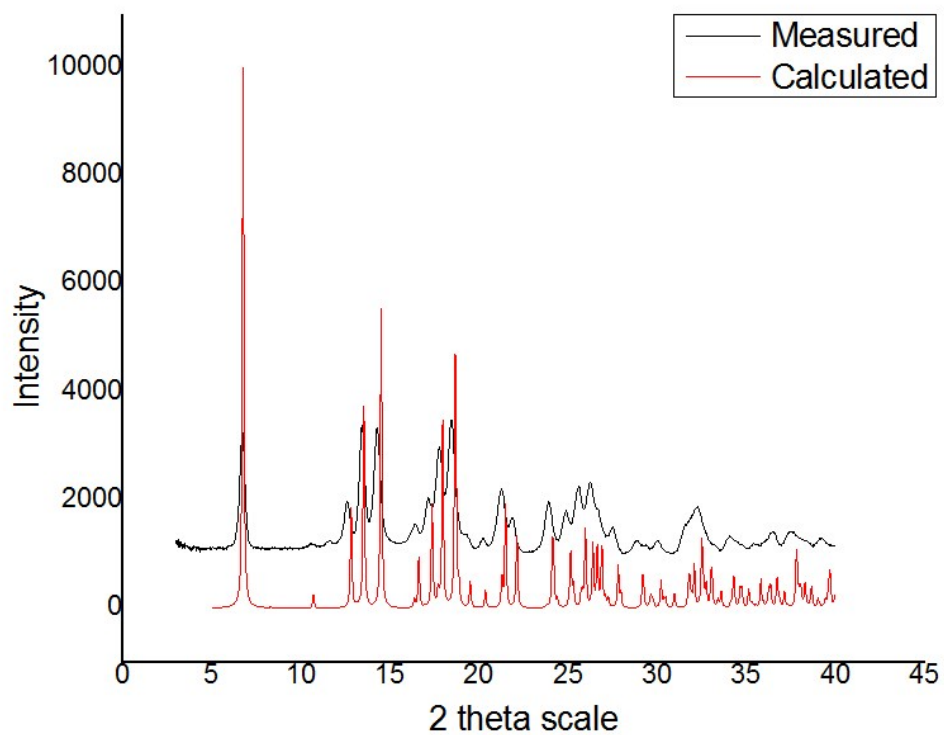

Supplement: c5ra24044a1.pdf [file c5ra24044a1.pdf]
